1 **Nasopharyngeal Microbiota as an early severity biomarker in COVID-19 hospitalised**  
2 **patients: a retrospective cohort study in a Mediterranean area.**

3 Maria Paz *Ventero*<sup>1¶</sup>, Oscar Moreno-Perez<sup>2,3¶</sup>, Carmen Molina-Pardines<sup>1\*</sup>, Andreu  
4 Paytuví-Gallart<sup>4,5</sup>, Vicente Boix<sup>6,3</sup>, Irene Galan<sup>7</sup>, Pilar González-delaAleja<sup>6</sup>, Mario López-  
5 Pérez<sup>8,1</sup>, Rosario Sánchez-Martínez<sup>9</sup>, Esperanza Merino<sup>6&</sup>, Juan Carlos Rodríguez<sup>1,8&</sup>.

6 <sup>1</sup> Microbiology Service, Alicante General University Hospital - Alicante Institute of Health and  
7 Biomedical Research (ISABIAL), Alicante, Spain

8 <sup>2</sup> Endocrinology and Nutrition department, Alicante General University Hospital - Alicante  
9 Institute of Health and Biomedical Research (ISABIAL), Alicante, Spain

10 <sup>3</sup> Clinical Medicine department, Miguel Hernández University, Elche, Spain

11 <sup>4</sup> Sequentia Biotech, Carrer Comte d'Urgell 240, 08036 Barcelona, Spain

12 <sup>5</sup> Open University of Catalonia (UOC), Rambla del Poblenou, 156, 08018 Barcelona, Spain

13 <sup>6</sup> Unit of Infectious Diseases, Alicante General University Hospital - Alicante Institute of Health  
14 and Biomedical Research (ISABIAL), Alicante, Spain

15 <sup>7</sup> Pneumology department, Alicante General University Hospital - Alicante Institute of Health and  
16 Biomedical Research (ISABIAL), Alicante, Spain

17 <sup>8</sup> Evolutionary Genomics Group, División de Microbiología, Universidad Miguel Hernández

18 <sup>9</sup> Internal Medicine department, Alicante General University Hospital - Alicante Institute of  
19 Sanitary and Biomedical Research (ISABIAL), Alicante, Spain

20 **\* *Corresponding author***

21 **Carmen Molina Pardines – E-mail: [carmenmolinapardines@gmail.com](mailto:carmenmolinapardines@gmail.com)**

22 **(¶ *these authors contributed to the manuscript equally and share the first authorship*)**

23 (***Esperanza Merino and Juan Carlos Rodríguez are Joint Senior Authors***)

24 **Short title**

25 Nasopharyngeal Microbiota and COVID19 outcomes

26 **Keywords:**

27 Microbiota, COVID-19, SARS-COV-2, severity biomarker, prognosis

28

## 29 **Abstract**

30 **Background.** There is mounting evidence suggesting that the microbiome composition  
31 could be different in COVID-19 patients. However, the relationship between microbiota  
32 and COVID-19 severity progression is still being assessed. This study aimed to analyse  
33 the diversity and taxonomic composition of the nasopharyngeal microbiota, to  
34 determine its association with COVID-19 clinical outcome.

35 **Methods and Findings.** Samples came from a retrospective cohort of adult patients with  
36 COVID-19, hospitalised in a tertiary centre. To study the nasopharyngeal microbiota, we  
37 utilized 16S rRNA sequencing. Raw sequences were processed by QIIME2. The  
38 associations between the microbiota, invasive mechanical ventilation (IMV), and all-  
39 cause mortality were analysed by multiple logistic regression (OR; 95%CI), adjusted for  
40 age, gender, and comorbidity. 177 patients were included: median age 68.0 years, 57.6%  
41 males, 59.3% had a Charlson comorbidity index  $\geq 3$ , and 89.2% with pneumonia. The  
42 microbiota  $\alpha$  diversity indexes were lower in patients with a fatal outcome, and this  
43 association persisted after adjustment for the main confounders; whereas the  $\beta$   
44 diversity analysis showed a significant clustering, grouping the patients with a fatal  
45 outcome. After multivariate adjustment, the presence of *Selenomonas spp.*, *Filifactor*  
46 *spp.*, *Actinobacillus spp.*, or *Chroococciopsis spp.*, was associated with a reduced risk  
47 of IMV (adjusted OR 0.06[95%CI 0.01–0.047],  $p = 0.007$ ).

48 **Conclusions.** The microbiota diversity and taxonomic composition are related to COVID-  
49 19 severity. Higher diversity and the presence of certain genera in the nasopharyngeal  
50 microbiota seem to be early biomarkers of a favourable clinical evolution in hospitalised  
51 patients with moderate to severe SARS-CoV-2 infections.

## 52 **Introduction**

53 In this time of pandemic finding early prognostic markers of COVID-19 severity is of  
54 utmost importance [1,2]. It is known that poor outcomes related to COVID-19 are not  
55 only a consequence of the viral infection, but are also related to an aberrant host  
56 immune response, including the vast release of cytokines by the immune system,  
57 leading to uncontrolled inflammation and multi-organ failure [3].

58 Several risk or prognostic factors, such as genetic factors, comorbidities, age, sex, and  
59 geographical location, have been associated with COVID-19 severity [2,4,5]. Taken  
60 together, these characteristics could have a determining role in promoting immune  
61 responses, and preventing an excessive anti-viral immune reaction.

62 Microbiota may be related to or influence the natural history of certain infectious  
63 diseases [6]. For example, in *Clostridioides difficile* infection, a lower diversity of  
64 microbiota and a decrease in several families are associated with the incidence and  
65 clinical evolution of the disease [7]. Likewise, the respiratory microbiota have also been  
66 correlated with the clinical evolution of chronic respiratory diseases [8] and respiratory  
67 viral infections [9].

68 Regarding microbiota and COVID-19 pathology, many published studies have focused  
69 on the differences between COVID-19 and non-COVID-19 patients, suggesting a possible  
70 role of the gut or respiratory microbiota in susceptibility to SARS-CoV-2 infection [10,11].  
71 Additionally, some studies have shown a relationship between the composition of the  
72 gut and respiratory microbiota and disease severity [12]. This relationship appears to be  
73 mainly based on the capacity of the microbiota to modulate the immune response  
74 [13,14], through modification of the gut-lung axis [12,15,16], and to alter the expression

75 of angiotensin-converting enzyme 2 (ACE2) receptors, which are used by SARS-CoV-2 to  
76 enter host cells [17,18].

77 The available evidence suggests a potential role of microbiota in susceptibility to SARS-  
78 CoV-2 infection and COVID-19 severity, but longitudinal studies evaluating the  
79 microbiota as a prognostic factor for severity of disease progression are lacking. The  
80 data regarding the association between nasopharyngeal microbiota features and  
81 disease severity are scarce, and limited in terms of showing a decrease in  $\alpha$  diversity or  
82 identifying specific genera with relevance to critical illness [19,20]. Since the sampling of  
83 this location is very accessible, with the nasopharyngeal aspirate swab diagnostic  
84 confirmation procedure able to obtain this information, it should be a priority to address  
85 the relationship between nasopharyngeal microbiota and COVID-19 outcomes.

86 This study aimed to analyse the nasopharyngeal microbiota from hospitalised COVID-19  
87 patients, to determine the relationship between the microbiota and SARS-CoV-2  
88 infection clinical outcomes and to identify features or genera that could be used as  
89 severity prognostic markers.

90

## 91 **Materials and methods**

### 92 *Patients and study design*

93 A retrospective cohort of adult patients with COVID-19, hospitalised in a tertiary centre  
94 (Alicante University General Hospital, Spain) from February 27<sup>th</sup> 2020 to January 22<sup>nd</sup>  
95 2021, was studied. SARS-CoV-2 infection was confirmed by the RT-PCR-COBAS 6800  
96 System (Roche Molecular Systems, Branchburg, NJ, United States). At hospital admission

97 one nasopharyngeal specimen per patient was obtained, stored at -80°C and later  
98 analysed.

99 Of the 1526 patients hospitalised in the study period, nasopharyngeal samples from 324  
100 patients were randomly processed and preserved. Due to the available economic  
101 resources, sixty percent of the samples were randomly sampled for processing; 17  
102 samples did not correspond to the first PCR sample, so they were discarded. Finally, 177  
103 patients were included in the study.

#### 104 *Variables and data collection*

105 The clinical features, comorbidity, laboratory and radiological tests, prescribed  
106 therapies, and outcome during the acute phase of the infection by SARS-CoV-2 were  
107 extracted from the digital medical record.

108 The main explanatory variables of the analysis were the microbiota diversity, measured  
109 by the  $\alpha$  and  $\beta$  diversity indexes, and the taxonomic composition, expressed by the  
110 differentially represented genera.

111 Primary Outcomes: Invasive mechanical ventilation (IMV) and all-cause mortality.

#### 112 *DNA isolation and microbiota amplicon next-generation sequencing (NGS)*

113 The nasopharyngeal samples frozen at -80 °C were used for DNA isolation with the  
114 QIAamp MiniElute Virus Spin Kit (Quiagen, Hilden, Germany), following the protocol  
115 recommended by the manufacturer. The DNA obtained was quantified with a Qubit 4  
116 Fluorometer, using a Qubit dsDNA HS Assay Kit (ThermoFisher Scientific, Massachusetts,  
117 United States). The microbiota amplicon sequencing was performed following the

118 protocol of the 16S Metagenomics Sequencing Library Preparation recommended by  
119 Illumina. The V3 and V4 region from 16S rRNA gene were amplified by PCR, and then the  
120 fragments obtained were sequenced in the MiSeq system with V3 reagents (600 cycle,  
121 2x300bp).

#### 122 *Bioinformatic analyses*

123 The raw reads obtained from the NGS were analysed using QIIME2 (2021.2 version)  
124 [21]. The denoising was performed with the plugin DADA2 and to avoid contamination  
125 and false positives a BLAST against the database of human genome of NCBI was  
126 performed, as well as singletons were removed. The taxonomy was assigned using the  
127 SILVA Database (Release 132) [22]. Regarding the microbiota analyses, the Shannon,  
128 Pielou, and Simpson indexes were calculated to study the  $\alpha$  diversity, and the UniFrac  
129 weighted distance plus PCoA were performed to analyse the  $\beta$  diversity. The genera that  
130 were differentially represented between severity groups (main outcomes present or  
131 not) were determined using the R package DESeq2 (4.1.0 version) [23]. The linear model  
132 obtained by DESeq2 was adjusted by the prescription of antibiotic treatment 3 months  
133 earlier.

#### 134 *Statistical analysis*

135 Categorical and continuous variables are given as frequencies (percentages) and as the  
136 median (interquartile range), respectively. Patients of the global cohort that were  
137 included and excluded were compared by Mann-Whitney's U, chi-squared, and Fisher's  
138 exact tests. Cumulative incidences of outcomes (95% confidence intervals (95%CI)) were  
139 registered. The final date of follow-up was March 1, 2021, unless censored. The  
140 differences between groups in the  $\beta$  diversity were assessed using the PERMANOVA

141 test. Associations were evaluated by a chi-squared test. Multiple logistic regression  
142 models adjusted for age, gender, and comorbidity were built to evaluate the association  
143 between microbiota diversity indexes or the differentially represented genus (obtained  
144 by DESeq2) with the primary outcomes, and the odds ratios (OR) with the 95%CI were  
145 estimated. IBM SPSS Statistics v25 (Armonk, NY) was used for the analyses.  $P < 0.050$   
146 defined statistical significance.

#### 147 *Ethics statement and data availability*

148 This project was performed in the Clinical and Biomedical Research Institute of Alicante  
149 (ISABIAL), under the written approval of the Ethics Committee of Clinical Research with  
150 Drugs (in Spanish, CEIm) of the General University Hospital of Alicante (Ref CEIm  
151 approval: PI2020-052).

152 The raw data from the sequencing are available in the National Center for Biotechnology  
153 Information Database (NCBI), under the Bioproject accession number PRJNA754005.

#### 154 **Results**

155 A total of 177 patients were included in the study. The study population and the global  
156 cohort of 1526 patients hospitalised while the study lasted were similar in age, gender,  
157 comorbidities, extent of infiltrates on chest radiograph, dexamethasone use, duration  
158 of hospitalization, and outcomes: IMV and mortality ( $p > 0.05$ ).

159 Table 1 shows the general characteristics of the study population and the main features  
160 of the COVID-19 acute phase infection and its clinical evolution. The patients had a  
161 median age of 68.0 years (IQR) (52.0–80.0); 57.6% were males and 59.3 % had a Charlson  
162 comorbidity index  $\geq 3$ . They were assessed in the emergency department after a median



163 of 6 [3–7] days of symptoms, and 89.2% had pneumonia. Fifty-one patients (28.8%) had  
164 received antibiotic therapy in the 3 months prior to their hospital admission, for a  
165 median of 5 [2–6] days. The mortality rate was 17.5% (95%CI, 12.6–23.7) (31/177), and  
166 11.3% (95%CI, 7.4–16.8) (20/177) required IMV.

167 **Table 1. Demographic characteristics, comorbidities, clinical presentation, and clinical outcomes.**  
168

169

|                                             | Population<br>[n= 177] |
|---------------------------------------------|------------------------|
| <b>Demographics</b>                         |                        |
| Age, median (IQR), years                    | 68 (52–80)             |
| Age≥ 65 years old, % (N)                    | 55.9 (99/177)          |
| Males, % (N)                                | 57.6 (102/177)         |
| Nosocomial, % (N)                           | 1.7 (3/177)            |
| Long-term care resident, % (N)              | 4 (7/177)              |
| Health professional, % (N)                  | 4 (7/177)              |
| Waves                                       |                        |
| First (1.02.2020 - 31.05.2020), % (N)       | 54.2 (96/177)          |
| Second (1.06.2020 - 15.12.2020), % (N)      | 31.1 (55/177)          |
| Third (16.12.2020 - 31.03.2021), % (N)      | 14.7 (26/177)          |
| Antibiotic therapy in the previous 3 months | 28.8 (51/177)          |
| <b>Comorbidities</b>                        |                        |
| Hypertension, % (N)                         | 55.9 (99/177)          |
| Diabetes, % (N)                             | 26.6 (47/177)          |
| Current or former Smoker, % (N)             | 20.6 (70/177)          |
| Obesity, % (N)                              | 39.7 (56/141)          |
| Chronic respiratory disease, % (N)          | 21.6 (38/177)          |
| Immunosuppression, % (N)                    | 4 (7/177)              |

|                                                                      |                  |
|----------------------------------------------------------------------|------------------|
| Charlson comorbidity index, median (IQR)                             | 3 (1–6)          |
| Charlson index $\geq 3$ , % (N)                                      | 59.3% (105/177)  |
| 10-years expected survival <sup>a</sup>                              | 53.3 (1.6–90.1)  |
| <b>Clinical Presentation</b>                                         |                  |
| Median time (IQR) from symptom to hospitalization, days <sup>b</sup> | 6 (3–7)          |
| Fever, % (N)                                                         | 67.2 (119/177)   |
| Cough, % (N)                                                         | 26.0 (46/177)    |
| Dyspnoea, % (N)                                                      | 57.6 (102/177)   |
| <b>Diarrhoea</b> , % (N)                                             | 25 (44/177)      |
| Confusion, % (N)                                                     | 9.6 (17/177)     |
| Fatigue, % (N)                                                       | 41.0 (71/173)    |
| Myalgias-arthralgias, % (N)                                          | 30.1 (52/173)    |
| Anosmia-dysgeusia, % (N)                                             | 6.9 (12/173)     |
| <b>Initial Assessment</b>                                            |                  |
| Oximetry $< 94\%$ at room air, % (N)                                 | 43.7% (73/167)   |
| PaO <sub>2</sub> :FiO <sub>2</sub> , median (IQR)                    | 332 (272–404)    |
| Respiratory rate, breaths/min, median (IQR)                          | 18 (16–24)       |
| Systolic BP, mmHg, median (IQR)                                      | 130 (118–145)    |
| Diastolic BP, mmHg, median (IQR)                                     | 78 (68–89)       |
| Temperature, °C, median (IQR)                                        | 36.9 (36.3–37.7) |
| Heart rate, beats/min, median (IQR)                                  | 92 (81–102)      |
| eGFR, ml/min/m <sup>2</sup> , median (IQR)                           | 73 (47–90)       |
| Lymphocytes, per mm <sup>3</sup> , median (IQR)                      | 910 (700–1370)   |
| Lymphopenia, % (N)                                                   | 44.3 (78/176)    |
| C-reactive protein $> 10$ mg/dL, % (N)                               | 33.1 (55/175)    |
| Procalcitonin $> 0.5$ ng/mL, % (N)                                   | 12.4 (20/161)    |

|                                                        |                |
|--------------------------------------------------------|----------------|
| Ferritin > 500 mg/L, % (N)                             | 59.8 (98/164)  |
| Lactate dehydrogenase > 250 U/L, % (N)                 | 33.9 (53/156)  |
| D-dimers > 1 mg/mL, % (N)                              | 33.1 (53/160)  |
| Interleukin 6 ≥ 10 pg/mL, % (N)                        | 77.7 (101/130) |
| Troponin T > 14 ng/L, % (N)                            | 49.4 (77/176)  |
| Brain natriuretic peptide > 125 pg/mL, % (N)           | 53.5 (84/157)  |
| Potassium mmol/L, median (IQR)                         | 4.1 (3.8–4.4)  |
| Pneumonia on X-rays, % (N)                             | 89.2 (157/176) |
| Opacities >50% of lung surface on X-rays, % (N)        | 21.5 (38/177)  |
| <b>Treatment</b>                                       |                |
| Corticosteroids, % (N)                                 | 46.3% (82/177) |
| Remdesivir, % (N)                                      | 3.9% (7/177)   |
| Tocilizumab, % (N)                                     | 23.7% (42/177) |
| <b>Outcomes</b>                                        |                |
| Non-invasive mechanical ventilation requirement, % (N) | 23.1 (41/177)  |
| Invasive mechanical ventilation requirement, % (N)     | 11.3 (20/177)  |
| Mortality, % (N)                                       | 17.5 (31/177)  |

171

173

174 Data shown as %, median (interquartile range, IQR), unless specified otherwise. In bold, statistically sig-  
175 nificant differences.

176 Percentages may not total 100 because of rounding.

177 <sup>a</sup>10-years expected survival derived from Charlson comorbidity index score.

178 <sup>b</sup>Days of symptoms before admission. OR: odds ratio, 95%CI: 95% confidence interval.

179

## 180 *Diversity analysis and outcomes*

181 The  $\alpha$  diversity indexes were lower in patients with a fatal outcome: Shannon 3.59[2.86–  
182 4.42] vs. 4.39[3.12–5.14],  $p=0.014$ ; Pielou 0.58[0.50–0.67] vs. 0.71[0.55–0.79],  $p=0.007$ ;  
183 and Simpson index 0.80[0.62–0.88] vs. 0.89[0.76–0.94],  $p=0.018$  (**Figs 1A, 1B, and 1C**).

184 The protective effect of a greater microbiota diversity persisted for the Shannon

185 (adjusted OR (aOR) 0.654 [95%CI 0.448–0.956],  $p = 0.028$ ) and Pielou indexes (aOR  
186 0.055[95%CI 0.003–0.823],  $p = 0.036$ ) after adjustment for age, gender, and  
187 comorbidities. The  $\beta$  diversity analysis showed a significant clustering ( $p= 0.014$ ),  
188 grouping together the fatal outcome patients (**Fig 1D**). In the case of IMV, neither the  $\alpha$   
189 diversity indexes nor  $\beta$  diversity analyses showed any significant differences.

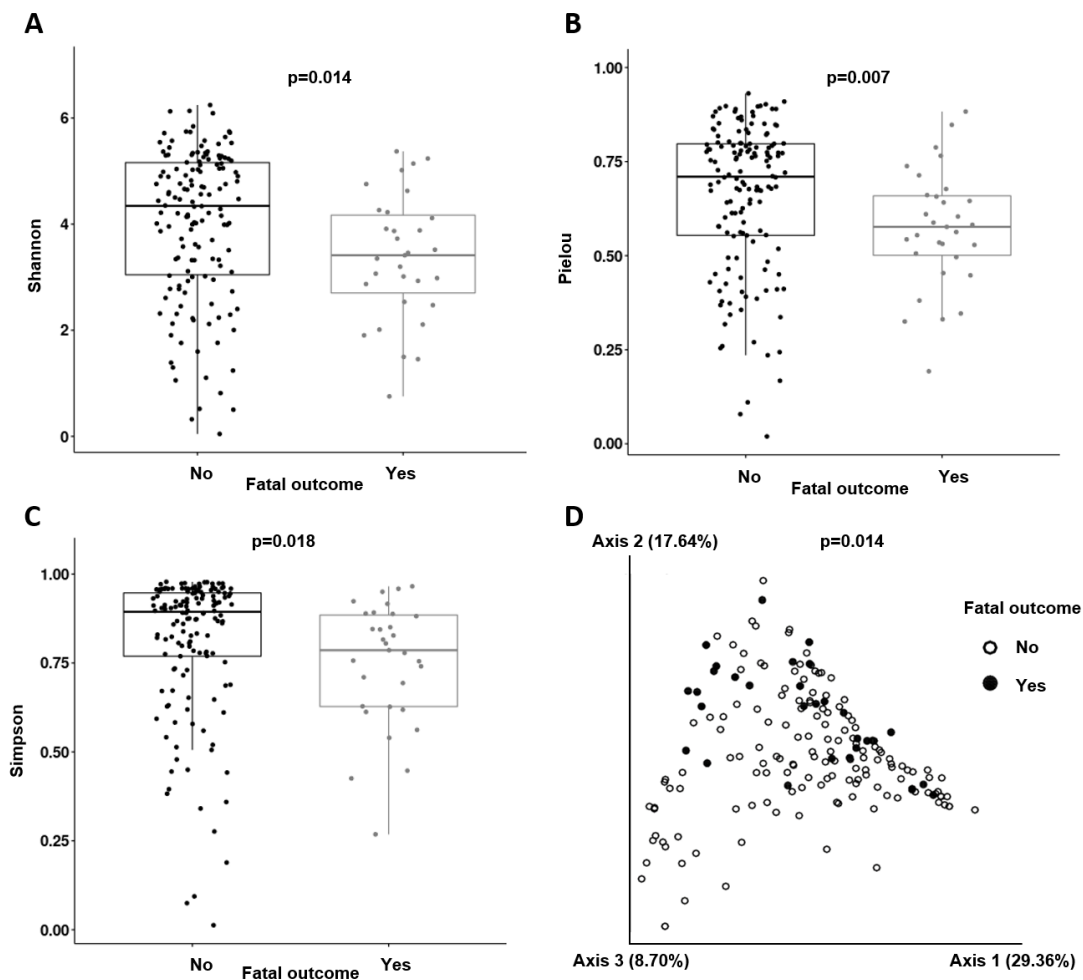

190

191 **Fig 1. Diversity analysis:** Boxplots obtained for the Shannon index (**A**), Pielou index (**B**),  
192 and Simpson index (**C**). PCoA (principal coordinates analysis) for the  $\beta$  diversity  
193 distribution along the samples (**D**).

194

195

196 *Taxonomic analysis and outcomes*

197 *Streptococcus spp.* (14.14 %), *Staphylococcus spp.* (12.12%), and *Corynebacterium spp.*  
198 (9.11%) were the genera that were more abundant in COVID-19 patients, without  
199 significant differences between patients with IMV or a fatal outcome. By group, there  
200 were 34.20% (483/1412) taxa shared between IMV/non-IMV subpopulations, 4.67%  
201 (66/1412) taxa exclusively found in IMV patients, and 61.12% (863/1412) taxa only  
202 detected in non-IMV patients (**Fig 2A**).

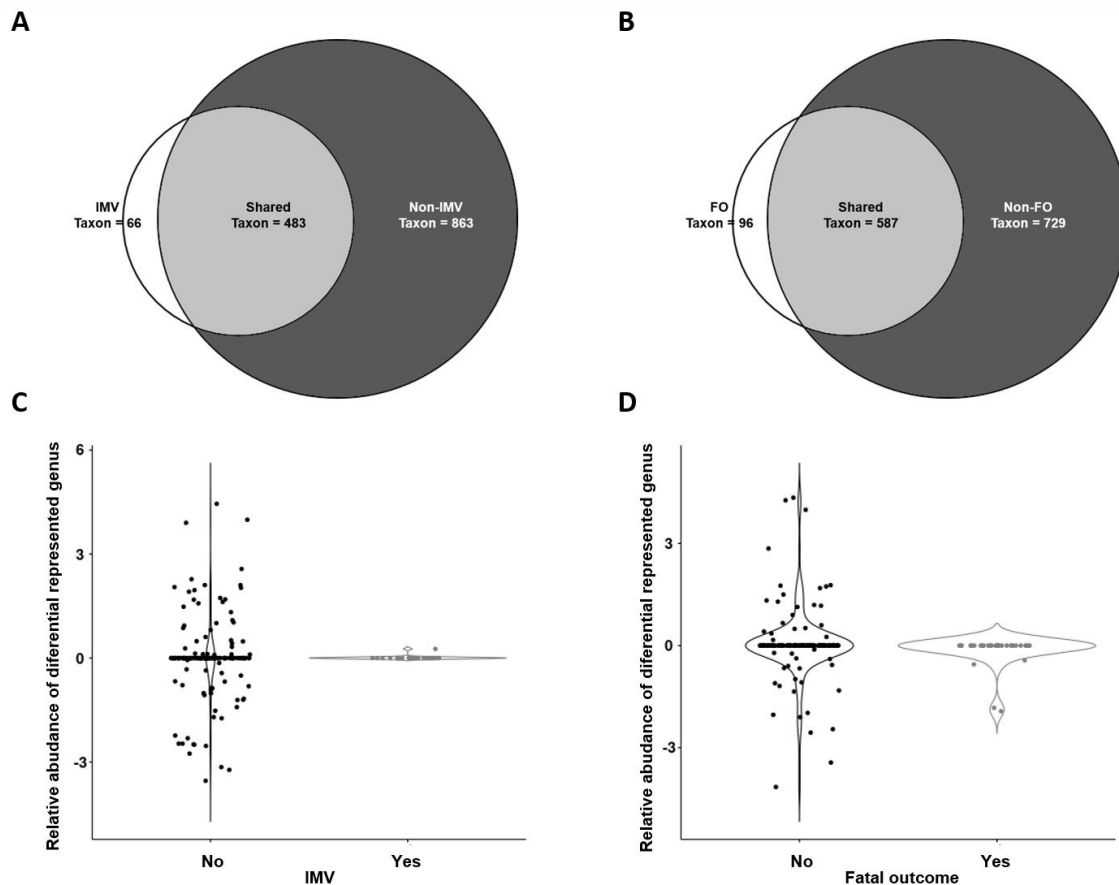

203

204 **Fig 2. Taxonomic analysis:** Venn diagrams for IMV (**A**), and fatal outcome (**B**), and  
205 relative abundances of differential genera for IMV (**C**), and fatal outcome  
206 subpopulations (**D**). Relative abundances are shown in logarithmic scale. IMV: invasive  
207 mechanical ventilation, FO: Fatal outcome.

208

209 Regarding fatal outcomes, the results were similar. The shared taxa comprised 41.57%  
210 (587/1412), taxa exclusively found in the exitus subpopulation were 6.8% (96/1412), and  
211 in survivors 51.2% (729/1412) (**Fig 2B**).

212 *Differently represented genera and outcomes*

213 This study was performed to identify differential genera between the subpopulations  
214 with and without specific outcomes. We found that *Selenomonas spp.* ( $\text{LogFC} = 23.96$ ;  
215  $p < 0.0001$ ), *Filifactor spp.* ( $\text{LogFC} = 23.51$ ;  $p < 0.0001$ ), *Actinobacillus spp.* ( $\text{LogFC} = 24.86$ ;  
216  $p < 0.0001$ ) and *Chroococidiopsis spp.* ( $\text{LogFC} = 22.31$ ;  $p < 0.0001$ ) were significantly more  
217 abundant in non-IMV patients (**Fig 2C**). The presence of *Selenomonas spp.*, *Filifactor*  
218 *spp.*, *Actinobacillus spp.*, or *Chroococidiopsis spp.*, was associated with a reduced risk  
219 of IMV (OR 0.062 [95%CI 0.01–0.47],  $p = 0.007$ ). This protective association persisted  
220 after adjustment for the main confounders in the multivariate model (**Fig 3**).

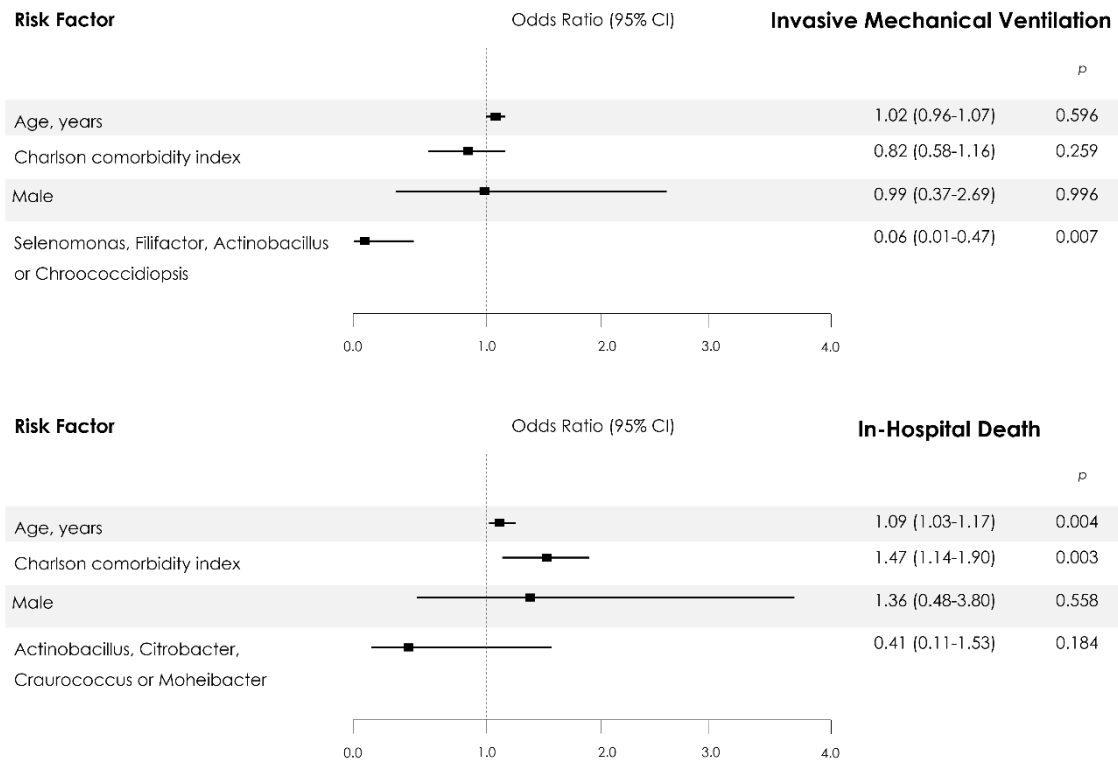

221

222 **Fig 3. Predictors of Invasive Mechanical Ventilation and In-Hospital Death from**  
 223 **Multivariable Logistic-Regression Analysis.** The 95% confidence intervals (CIs) of the odds  
 224 ratios have been adjusted for multiple testing.

225 For fatal outcomes, *Actinobacillus spp.* ( $\text{LogFC} = 24.30$ ;  $p < 0.0001$ ), *Citrobacter spp.*  
 226 ( $\text{LogFC} = 25.21$ ;  $p < 0.0001$ ), *Craurococcus spp.* ( $\text{LogFC} = 22.77$ ;  $p < 0.0001$ ), and  
 227 *Moheibacter spp.* ( $\text{LogFC} = 22.7$ ;  $p < 0.0001$ ) were significantly more abundant in non-  
 228 exitus patients (**Fig 2D**). The presence of *Actinobacillus spp.*, *Citrobacter spp.*,  
 229 *Craurococcus spp.*, or *Moheibacter spp.*, was associated with a reduced risk of a fatal  
 230 outcome (OR 0.309[95%CI 0.10–0.93],  $p = 0.037$ ). This association did not persist after  
 231 adjustment for the main confounders in the multivariate model (**Fig 3**).

232

233

## 234 Discussion

235 Recently, several studies assessing the relationship between the gut microbiome and  
236 the severity of COVID-19 have been published [24,25]. However, to our knowledge, this  
237 is the first study that has evaluated nasopharyngeal microbiota at the time of admission  
238 as a prognosis biomarker of severity of disease progression in the acute infection phase  
239 of SARS-CoV-2, in a large cohort of hospitalised patients with COVID-19. The assessment  
240 showed a significant decrease of all diversity indexes studied (Shannon, Pielou, and  
241 Simpson) in patients with a final fatal outcome, linking an initial low microbiota diversity  
242 with COVID19 severity. The presence of four specific genera, *Selenomonas spp.*,  
243 *Filifactor spp.*, *Actinobacillus spp.* or *Chroococciopsis spp.*, was associated with a  
244 reduction of more than 90% of IMV, regardless of age, gender, or comorbidity. The  
245 presence of *Actinobacillus spp.*, *Citrobacter spp.*, *Craurococcus spp.* or *Moheibacter spp.*  
246 was associated with a 70% reduction in mortality, but this relationship did not persist  
247 after adjustment for the main confounders.

248 The relationship between the microbiota and COVID-19 is an active and expanding field  
249 of research. Previous studies have been focused in the differences of the gut microbiota  
250 between COVID-19 and non-COVID19 patients, or its correlation with severity  
251 inflammatory markers [10,11]. However, there has been limited investigation into the  
252 relationship between microbial communities and COVID-19 clinical outcome.

253 Regarding COVID-19 and the gut microbiome, Gu et al. [26] reported that COVID-19  
254 patients had a lower diversity microbiota (Shannon and Chao1 index) than healthy  
255 controls; also, several microorganisms (*Streptococcus spp.*, *Rothia spp.*, *Veillonella spp.*  
256 and *Actinomyces spp.*) were identified that could be used as COVID-19 biomarkers.



257 According to these data, Zuo et al. [27], using the Bray-Curtis dissimilarities test,  
258 described alterations in the gut microbiome at the whole genome level, since their  
259 COVID19 patients were more heterogeneous than healthy controls. Yeoh et al. [12]  
260 found that specific genera, such as *Bifidobacterium adolescentis*, *Eubacterium rectale*,  
261 and *Faecalibacterium prausnitzii*, were depleted in the COVID-19 cohort when  
262 compared with non-COVID-19 patients, and were negatively correlated with the  
263 inflammatory marker CXCL10. The same correlation was reported by Zou et al. [27].  
264 Likewise, Gou et al. [28] showed that the *Bacteroides* genus, and specifically *B. ovatus*,  
265 was associated with inflammatory cytokines such as IL-6, TNF- $\alpha$  and IFN- $\gamma$  [28]. These  
266 depleted species in COVID-19 patients are known to play immunomodulatory roles in  
267 the human gastrointestinal system [29].

268 In terms of the association of the upper respiratory tract microbiome and SARS-COV-2  
269 infection, the studies performed to date have included small cohorts of patients. Braun  
270 et al. [30] (n=33), De Maio et al. [31] (n=40), and Liu et al. [32] (n=9) showed no  
271 significant differences in the nasopharyngeal microbial community between COVID-19  
272 and control patients using  $\alpha$ - $\beta$  diversity and taxonomic compositional analysis. Whereas  
273 Mostafa et al. [33] (n=50) and Engen et al. [34] (n=19) reported a lower  $\alpha$  diversity  
274 (Chao1, Shannon, and Simpson indexes) in COVID-19 compared to healthy patients, and  
275 both groups showed significant dissimilarities in  $\beta$  diversity. Therefore, there is  
276 controversy regarding lung and nasopharyngeal microbiota composition on SARS-CoV2  
277 infection.

278 Regarding microbiota and COVID-19 severity, Ma et al. [19] explored the oropharyngeal  
279 microbiome in COVID-19 patients (n=31) with various severities (mild, moderate, severe,

280 or critical) compared with flu patients (n=29) and healthy controls (n= 28) using high-  
281 throughput metagenomics. They showed that critical COVID-19 patients presented with  
282 a significant diminution in  $\alpha$  diversity (Shannon index), while noncritical patients  
283 exhibited no significant change from the normal group.

284 The present work pioneered the analysis of the nasopharyngeal microbiota (using 16S  
285 rRNA gene sequencing), in a large cohort of hospitalised patients with COVID-19, as a  
286 prognosis biomarker. The lower diversity in patients with a fatal outcome is in  
287 agreement with the hypothesis that low microbiota diversity is associated with the  
288 development of several pathologies [35,36], and high diversity is associated with lower  
289 severity [37].

290 A study performed with 24 critically ill COVID-19 patients and 24 non-COVID-19 patients  
291 with pneumonia [38] showed taxonomical differences between the lung microbiota of  
292 COVID-19 and non-COVID-19 patients. The characteristic microorganisms of COVID-19  
293 patients were *Pseudomonas alcaligenes*, *Sphingobacterium spp.*, *Clostridium hiranonis*  
294 and *Acinetobacter schindleri*. While the genera that characterised the lung microbiota  
295 in the COVID-19-negative patients were *Streptococcus spp.*, *Haemophilus* or  
296 *Selenomonas spp.* Regarding the upper respiratory tract microbiota, Ma et al. [19] found  
297 increased ratios of *Klebsiella sp.*, *Acinetobacter sp.*, and *Serratia sp.* were correlated with  
298 both disease severity and elevated systemic inflammation markers (neutrophil–  
299 lymphocyte ratio). Along the same lines, *Prevotella spp.* was also linked to COVID-19  
300 severity, which has been hypothesised to suggest a possible relationship with the  
301 inflammatory response [20].

302 Our taxonomic analysis identified several microorganisms, such as *Selenomonas*,  
303 *Filifactor*, *Actinobacillus*, and *Chroococcidiopsis SAG 2023*, related to IMV, and  
304 *Craurococcus*, *Actinobacillus*, *Citrobacter* and *Moheibacter* related to a fatal outcome.  
305 Future research to determine their roles in COVID-19 development and evolution is  
306 required.

307 Our study has several limitations, this was an observational, retrospective, single-centre  
308 study, and collection of data was not standardized in advance. The sample size and the  
309 absence of differences in the characteristics of the global cohort of patients admitted to  
310 our hospital during the duration of the study reinforce the present data. Multiple factors  
311 can condition changes in microbiota, including the use of antibiotics. Nonetheless, the  
312 design of the statistical analysis adjusted for the use of antibiotic therapy in the 3  
313 months prior to the inclusion of the study, allowing us to limit this bias. The exclusion of  
314 these patients from the study would have greatly limited the external validity of our  
315 results. Finally, the 16S ribosomal RNA amplicon sequencing approach to study the  
316 microbiota could introduce bias in the obtained data because this method does not  
317 allow the study of the whole microbiome, but only the genera amplified by PCR.  
318 Nevertheless, it is the most common technique to study microbiota in clinical samples.  
319 Moreover, the microbiota bioinformatics analysis has not been standardized yet, which  
320 hampered comparison interpretations of our results.

321 In summary, the higher diversity found in patients without IMV or a fatal outcome,  
322 together with the presence of certain genera in the nasopharyngeal microbiota, seemed  
323 to be an early biomarker of a favourable clinical evolution in a cohort of Mediterranean  
324 hospitalised patients with SARS-CoV-2 infection. Our findings have potential clinical

325 relevance due to the feasibility and low cost of developing rapid molecular techniques  
326 to evaluate the diversity and detect these genera at the time of admission. These data,  
327 taken together with other prognostic markers already being implemented, may allow  
328 identifying patients with a good prognosis (i.e., a 70–90% reduction in unfavourable  
329 clinical outcomes). Considering the clinical significance of these findings and the ease of  
330 their application in daily practice, further investigation to confirm these data could be  
331 very relevant for improving COVID-19 management.

### 332 **Funding**

333 This work was supported by the “Health Institute Carlos III” [grant number  
334 COV20\_00236]. This research has also been funded by the Clinical and Biomedical  
335 Research Institute of Alicante (ISABIAL) [grant number Ref. ISABIAL: 2020-0356].

### 336 **Conflict of interest**

337 The authors declare no conflict of interest.

### 338 **References**

- 339 1. Liu J, Liu S. The management of coronavirus disease 2019 (COVID-19). *Journal of*  
340 *Medical Virology*. John Wiley and Sons Inc.; 2020. pp. 1484–1490.  
341 doi:10.1002/jmv.25965
- 342 2. Andrés M, Leon-Ramirez JM, Moreno-Perez O, Sánchez-Payá J, Gayá I, Esteban V,  
343 et al. Fatality and risk features for prognosis in COVID-19 according to the care  
344 approach - a retrospective cohort study. *PLoS One*. 2021;16: e0248869.  
345 doi:10.1371/journal.pone.0248869
- 346 3. Tay MZ, Poh CM, Rénia L, MacAry PA, Ng LFP. The trinity of COVID-19: immunity,

- 347 inflammation and intervention. *Nat Rev Immunol* 2020 206. 2020;20: 363–374.  
348 doi:10.1038/s41577-020-0311-8
- 349 4. Moreno-P O, Leon-Ramirez JM, Fuertes-Kenneally L, Perdiguero M, Andres M,  
350 Garcia-Navarro M, et al. Hypokalemia as a sensitive biomarker of disease severity  
351 and the requirement for invasive mechanical ventilation requirement in COVID-  
352 19 pneumonia: A case series of 306 Mediterranean patients. *Int J Infect Dis.*  
353 2020;100: 449–454. doi:10.1016/J.IJID.2020.09.033
- 354 5. Dai CL, Kornilov SA, Roper RT, Cohen-Cline H, Jade K, Smith B, et al. Characteristics  
355 and Factors Associated With Coronavirus Disease 2019 Infection, Hospitalization,  
356 and Mortality Across Race and Ethnicity. *Clin Infect Dis.* 2021.  
357 doi:10.1093/CID/CIAB154
- 358 6. Pflughoeft KJ, Versalovic J. Human microbiome in health and disease. *Annual*  
359 *Review of Pathology: Mechanisms of Disease.* Annual Reviews ; 2012. pp. 99–  
360 122. doi:10.1146/annurev-pathol-011811-132421
- 361 7. Berkell M, Mysara M, Xavier BB, van Werkhoven CH, Monsieurs P, Lammens C, et  
362 al. Microbiota-based markers predictive of development of *Clostridioides difficile*  
363 infection. *Nat Commun* 2021 121. 2021;12: 1–14. doi:10.1038/s41467-021-  
364 22302-0
- 365 8. Budden KF, Shukla SD, Rehman SF, Bowerman KL, Keely S, Hugenholtz P, et al.  
366 Functional effects of the microbiota in chronic respiratory disease. *Lancet Respir*  
367 *Med.* 2019;7: 907–920. doi:10.1016/S2213-2600(18)30510-1
- 368 9. Hanada S, Pirzadeh M, Carver KY, Deng JC. Respiratory Viral Infection-Induced

- 369 Microbiome Alterations and Secondary Bacterial Pneumonia. *Front Immunol.*  
370 2018;9: 2640. doi:10.3389/FIMMU.2018.02640
- 371 10. Marcialis MA, Bardanzellu F, Fanos V. Microbiota and Coronavirus Disease 2019.  
372 Which Came First, the Chicken or the Egg? *Clin Infect Dis.* 2020.  
373 doi:10.1093/cid/ciaa965
- 374 11. Yamamoto S, Saito M, Tamura A, Prawisuda D, Mizutani T, Yotsuyanagi H. The  
375 human microbiome and COVID-19: A systematic review. *PLoS One.* 2021;16:  
376 e0253293. doi:10.1371/JOURNAL.PONE.0253293
- 377 12. Yeoh YK, Zuo T, Lui GCY, Zhang F, Liu Q, Li AYL, et al. Gut microbiota composition  
378 reflects disease severity and dysfunctional immune responses in patients with  
379 COVID-19. *Gut.* 2021;70: 698–706. doi:10.1136/gutjnl-2020-323020
- 380 13. Khatiwada S, Subedi A. Lung microbiome and coronavirus disease 2019 (COVID-  
381 19): Possible link and implications. *Human Microbiome Journal.* Elsevier Ltd;  
382 2020. doi:10.1016/j.humic.2020.100073
- 383 14. van der Lelie D, Taghavi S. COVID-19 and the Gut Microbiome: More than a Gut  
384 Feeling. *mSystems.* 2020;5. doi:10.1128/msystems.00453-20
- 385 15. Din AU, Mazhar M, Wasim M, Ahmad W, Bibi A, Hassan A, et al. SARS-CoV-2  
386 microbiome dysbiosis linked disorders and possible probiotics role. *Biomedicine*  
387 *and Pharmacotherapy.* Elsevier Masson s.r.l.; 2021.  
388 doi:10.1016/j.biopha.2020.110947
- 389 16. Kaźmierczak-Siedlecka K, Vitale E, Makarewicz W. COVID-19 – Gastrointestinal  
390 and gut microbiota-related aspects. *Eur Rev Med Pharmacol Sci.* 2020;24: 10853–

- 391 10859. doi:10.26355/EURREV\_202010\_23448
- 392 17. Ahlawat S, Asha, Sharma KK. Immunological co-ordination between gut and lungs  
393 in SARS-CoV-2 infection. *Virus Research*. Elsevier B.V.; 2020. p. 198103.  
394 doi:10.1016/j.virusres.2020.198103
- 395 18. Koester ST, Li N, Lachance DM, Morella NM, Dey N. Variability in digestive and  
396 respiratory tract Ace2 expression is associated with the microbiome. *PLoS One*.  
397 2021;16: e0248730. doi:10.1371/journal.pone.0248730
- 398 19. Ma S, Zhang F, Zhou F, Li H, Ge W, Gan R, et al. Metagenomic analysis reveals  
399 oropharyngeal microbiota alterations in patients with COVID-19. *Signal Transduct*  
400 *Target Ther* 2021 61. 2021;6: 1–11. doi:10.1038/s41392-021-00614-3
- 401 20. Ventero MP, Cuadrat RRC, Vidal I, Andrade BGN, Molina-Pardines C, Haro-  
402 Moreno JM, et al. Nasopharyngeal Microbial Communities of Patients Infected  
403 With SARS-CoV-2 That Developed COVID-19. *Front Microbiol*. 2021;12: 637430.  
404 doi:10.3389/fmicb.2021.637430
- 405 21. Kuczynski J, Stombaugh J, Walters WA, González A, Caporaso JG, Knight R. Using  
406 QIIME to analyze 16S rRNA gene sequences from microbial communities. *Curr*  
407 *Protoc Microbiol*. 2012;Chapter 1: Unit 1E.5.  
408 doi:10.1002/9780471729259.mc01e05s27
- 409 22. Quast C, Pruesse E, Yilmaz P, Gerken J, Schweer T, Yarza P, et al. The SILVA  
410 ribosomal RNA gene database project: Improved data processing and web-based  
411 tools. *Nucleic Acids Res*. 2013;41: D590. doi:10.1093/nar/gks1219
- 412 23. Love MI, Huber W, Anders S. Moderated estimation of fold change and dispersion

- 413 for RNA-seq data with DESeq2. *Genome Biol* 2014 1512. 2014;15: 1–21.  
414 doi:10.1186/S13059-014-0550-8
- 415 24. Patel P, Roper J. Gut Microbiome Composition Is Associated with COVID-19  
416 Disease Severity. *Gastroenterology*. 2021;161: 722–724.  
417 doi:10.1053/J.GASTRO.2021.05.006
- 418 25. Dhar D, Mohanty A. Gut microbiota and Covid-19- possible link and implications.  
419 *Virus Res*. 2020;285. doi:10.1016/J.VIRUSRES.2020.198018
- 420 26. Gu S, Chen Y, Wu Z, Chen Y, Gao H, Lv L, et al. Alterations of the Gut Microbiota  
421 in Patients With Coronavirus Disease 2019 or H1N1 Influenza. *Clin Infect Dis*.  
422 2020;71: 2669–2678. doi:10.1093/CID/CIAA709
- 423 27. Zuo T, Zhang F, Lui GCY, Yeoh YK, Li AYL, Zhan H, et al. Alterations in Gut  
424 Microbiota of Patients With COVID-19 During Time of Hospitalization.  
425 *Gastroenterology*. 2020;159: 944-955.e8. doi:10.1053/J.GASTRO.2020.05.048
- 426 28. Gou W, Fu Y, Yue L, Chen G, Cai X, Shuai M, et al. Gut microbiota, inflammation,  
427 and molecular signatures of host response to infection. *J Genet Genomics*. 2021.  
428 doi:10.1016/J.JGG.2021.04.002
- 429 29. Nishida A, Inoue R, Inatomi O, Bamba S, Naito Y, Andoh A. Gut microbiota in the  
430 pathogenesis of inflammatory bowel disease. *Clin J Gastroenterol*. 2018;11.  
431 doi:10.1007/S12328-017-0813-5
- 432 30. Braun T, Halevi S, Hadar R, Efroni G, Glick Saar E, Keller N, et al. SARS-CoV-2 does  
433 not have a strong effect on the nasopharyngeal microbial composition. *Sci Rep*.  
434 2021;11: 8922. doi:10.1038/s41598-021-88536-6



- 435 31. Maio F De, Posteraro B, Ponziani FR, Cattani P, Gasbarrini A, Sanguinetti M.  
436 Nasopharyngeal Microbiota Profiling of SARS-CoV-2 Infected Patients. 2020.  
437 doi:10.21203/rs.3.rs-27326/v1
- 438 32. Liu J, Liu S, Zhang Z, Lee X, Wu W, Huang Z, et al. Association between the  
439 nasopharyngeal microbiome and metabolome in patients with COVID-19. Synth  
440 Syst Biotechnol. 2021;6: 135–143. doi:10.1016/J.SYNBIO.2021.06.002
- 441 33. Mostafa HH, Fissel JA, Fanelli B, Bergman Y, Gniazdowski V, Dadlani M, et al.  
442 Metagenomic next-generation sequencing of nasopharyngeal specimens  
443 collected from confirmed and suspect covid-19 patients. MBio. 2020;11: 1–13.  
444 doi:10.1128/MBIO.01969-20
- 445 34. Engen PA, Naqib A, Jennings C, Green SJ, Landay A, Keshavarzian A, et al.  
446 Nasopharyngeal Microbiota in SARS-CoV-2 Positive and Negative Patients. Biol  
447 Proced Online 2021 231. 2021;23: 1–6. doi:10.1186/S12575-021-00148-6
- 448 35. Kalantar KL, Moazed F, Christenson SC, Wilson J, Deiss T, Belzer A, et al.  
449 Metagenomic comparison of tracheal aspirate and mini-bronchial alveolar lavage  
450 for assessment of respiratory microbiota. Am J Physiol - Lung Cell Mol Physiol.  
451 2019;316: L578–L584. doi:10.1152/ajplung.00476.2018
- 452 36. Soltani S, Zakeri A, Zandi M, Kesheh MM, Tabibzadeh A, Dastranj M, et al. The  
453 Role of Bacterial and Fungal Human Respiratory Microbiota in COVID-19 Patients.  
454 BioMed Research International. Hindawi Limited; 2021.  
455 doi:10.1155/2021/6670798
- 456 37. Ogunrinola GA, Oyewale JO, Oshamika OO, Olasehinde GI. The Human

457 Microbiome and Its Impacts on Health. *Int J Microbiol.* 2020;2020.

458 doi:10.1155/2020/8045646

459 38. Gaibani P, Viciani E, Bartoletti M, Lewis RE, Tonetti T, Lombardo D, et al. The lower

460 respiratory tract microbiome of critically ill patients with COVID-19. *Sci Rep.*

461 2021;11: 10103. doi:10.1038/s41598-021-89516-6

462
